# Supplementary material for: Double C–H bond activation of acetylene by atomic boron in forming aromatic cyclic-HBC2BH in solid neon
Source: Royal Society of Chemistry journal article supplement (doi:10.1039/c7sc01399j), 2017-01-01
Supplement: c7sc01399j1.pdf [file c7sc01399j1.pdf]

### Supporting Information

#### Double C-H bond activation of acetylene by atomic boron in forming aromatic cyclic-HBC<sub>2</sub>BH in solid neon

Jiwen Jian, Wei Li, Xuan Wu, Mingfei Zhou\*

Department of Chemistry, Shanghai Key Laboratory of Molecular Catalysis and

Innovative Materials & Collaborative Innovation Center of Chemistry for Energy

Materials, Fudan University, Shanghai 200433, China. E-mail: [mfzhou@fudan.edu.cn](mailto:mfzhou@fudan.edu.cn)

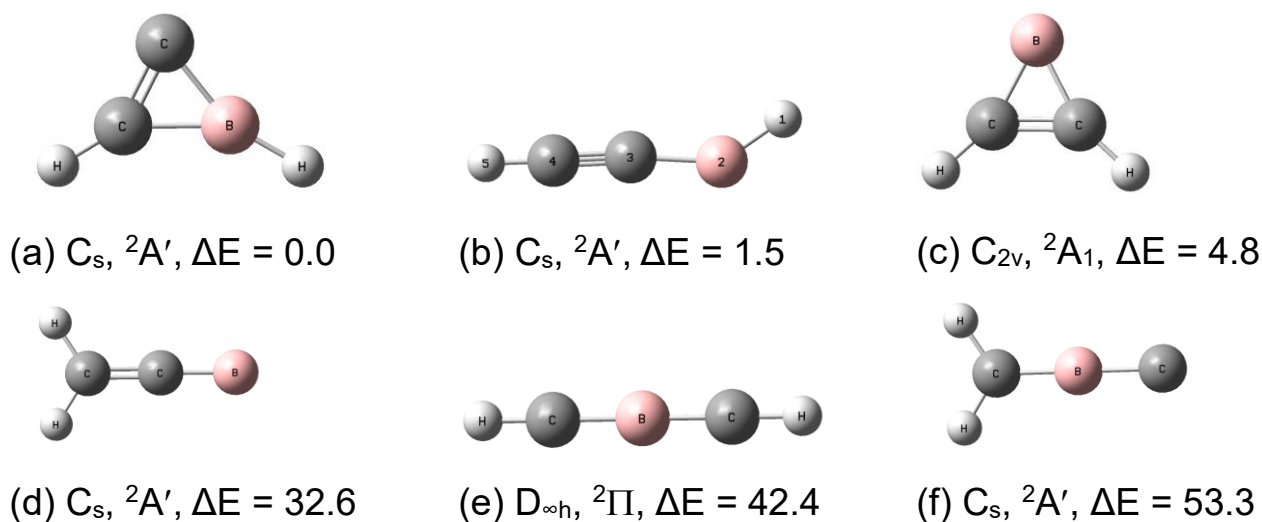

**Figure S1.** Optimized geometries (bond lengths in angstroms and bond angles in degrees) and relative stabilities (kcal/mol) of the BC<sub>2</sub>H<sub>2</sub> isomers at the B3LYP/aug-cc-pVTZ level.

**Table S1.** Experimental and calculated vibrational frequencies ( $\text{cm}^{-1}$ ) and intensities (km/mol in parentheses) of the cyclic-HBC<sub>2</sub>H isotopomers.

| H <sup>10</sup> B <sup>12</sup> C <sub>2</sub> H |        | H <sup>10</sup> B <sup>13</sup> C <sub>2</sub> H |        | D <sup>10</sup> B <sup>12</sup> C <sub>2</sub> D |        | H <sup>11</sup> B <sup>12</sup> C <sub>2</sub> H |        |         |
|--------------------------------------------------|--------|--------------------------------------------------|--------|--------------------------------------------------|--------|--------------------------------------------------|--------|---------|
| B3LYP                                            | Exptl. | B3LYP                                            | Exptl. | B3LYP                                            | Exptl. | B3LYP                                            | Exptl. | CCSD(T) |
| 3216.1(0.3)                                      |        | 3203.8(0)                                        |        | 2408.9(1)                                        |        | 3216.0(0.3)                                      |        | 3232.3  |
| 2793.1(56)                                       | 2708.5 | 2792.9(56)                                       | 2708.5 | 2109.1(54)                                       | 2066.4 | 2778.1(52)                                       | 2692.5 | 2776.9  |
| 1599.8(3)                                        |        | 1543.7(3)                                        |        | 1539.8(4)                                        |        | 1596.7(3)                                        |        | 1554.9  |
| 1185.9(69)                                       | 1158.2 | 1168.4(66)                                       | 1141.2 | 1133.4(53)                                       | 1098.2 | 1155.7(67)                                       | 1129.1 | 1143.9  |
| 1007.2(28)                                       | 984.3  | 984.9(30)                                        | 963.0  | 959.6(7)                                         |        | 1001.1(30)                                       | 978.5  | 1000.0  |
| 882.4(45)                                        | 831.0  | 876.9(30)                                        | 827.1  | 717.7(26)                                        |        | 876.3(45)                                        | 820.0  | 869.2   |
| 849.1(25)                                        |        | 844.5(23)                                        |        | 685.5(20)                                        |        | 836.8(23)                                        |        | 840.9   |
| 736.4(13)                                        |        | 732.8(12)                                        |        | 543.4(11)                                        |        | 735.7(12)                                        |        | 743.2   |
| 732.6(2)                                         |        | 729.9(2)                                         |        | 567.1(0)                                         |        | 729.1(1)                                         |        | 717.0   |

**Table S2.** Experimental and calculated vibrational frequencies ( $\text{cm}^{-1}$ ) and intensities (km/mol in parentheses) of the HBCCH isotopomers.

| $\text{H}^{10}\text{B}^{12}\text{C}_2\text{H}$ |        | $\text{H}^{10}\text{B}^{13}\text{C}_2\text{H}$ |        | $\text{D}^{10}\text{B}^{12}\text{C}_2\text{D}$ |        | $\text{H}^{11}\text{B}^{12}\text{C}_2\text{H}$ |        |         |
|------------------------------------------------|--------|------------------------------------------------|--------|------------------------------------------------|--------|------------------------------------------------|--------|---------|
| B3LYP                                          | Exptl. | B3LYP                                          | Exptl. | B3LYP                                          | Exptl. | B3LYP                                          | Exptl. | CCSD(T) |
| 3449.7(72)                                     | 3318.0 | 3433.2(71)                                     | 3302.9 | 2639.6(34)                                     | 2673.6 | 3449.7(72)                                     | 3318.0 | 3447.2  |
|                                                | 3307.2 |                                                | 3292.1 |                                                | 2667.1 |                                                | 3307.2 |         |
| 2782.4(54)                                     | 2674.3 | 2782.2(53)                                     | 2674.3 | 2095.0(53)                                     | 2060.0 | 2768.7(51)                                     | 2662.2 | 2731.4  |
|                                                | 2667.6 |                                                | 2667.6 |                                                | 2052.7 |                                                | 2655.2 |         |
| 2002.8(10)                                     |        | 1931.1(9)                                      |        | 1883.5(6)                                      |        | 2001.9(10)                                     |        | 2060.3  |
| 1064.5(20)                                     |        | 1052.1(20)                                     |        | 1011.8(10)                                     |        | 1035.3(20)                                     |        | 988.6   |
| 797.8(22)                                      |        | 789.8(22)                                      |        | 636.1(10)                                      |        | 797.8(22)                                      |        | 768.0   |
| 539.2(35)                                      |        | 535.4(35)                                      |        | 473.1(16)                                      |        | 532.1(34)                                      |        | 680.2   |
| 431.1(61)                                      |        | 427.6(62)                                      |        | 342.7(23)                                      |        | 431.1(61)                                      |        | 515.6   |
| 340.9(14)                                      |        | 332.9(11)                                      |        | 278.3(22)                                      |        | 340.5(14)                                      |        | 323.1   |
| 273.8(5)                                       |        | 266.3(4)                                       |        | 253.7(3)                                       |        | 273.5(5)                                       |        | 249.9   |

**Table S3.** Calculated vibrational frequencies ( $\text{cm}^{-1}$ ) and intensities ( $\text{km/mol}$  in parentheses) of the cyclic-B( $\text{C}_2\text{H}_2$ ) isotopomers.

| $^{10}\text{B}(^{12}\text{C}_2\text{H}_2)$ | $^{10}\text{B}(^{13}\text{C}_2\text{H}_2)$ | $^{10}\text{B}(^{12}\text{C}_2\text{D}_2)$ | $^{11}\text{B}(^{12}\text{C}_2\text{H}_2)$ |         |
|--------------------------------------------|--------------------------------------------|--------------------------------------------|--------------------------------------------|---------|
| B3LYP                                      | B3LYP                                      | B3LYP                                      | B3LYP                                      | CCSD(T) |
| 3221.7(1)                                  | 3208.6(1)                                  | 2425.5(0)                                  | 3221.5(1)                                  | 3235.7  |
| 3201.8(4)                                  | 3191.4(4)                                  | 2366.2(2)                                  | 3201.8(4)                                  | 3214.7  |
| 1540.1(1)                                  | 1498.0(2)                                  | 1466.1(1)                                  | 1526.5(0)                                  | 1490.4  |
| 1234.6(74)                                 | 1209.0(70)                                 | 1232.1(68)                                 | 1206.1(73)                                 | 1186.9  |
| 1187.6(5)                                  | 1160.1(6)                                  | 1115.1(0)                                  | 1179.8(6)                                  | 1170.0  |
| 1024.1(1)                                  | 1012.8(0)                                  | 821.2(0)                                   | 1024.1(0)                                  | 1002.0  |
| 928.1(26)                                  | 920.7(26)                                  | 759.0(15)                                  | 917.1(26)                                  | 906.9   |
| 887.7(20)                                  | 887.3(20)                                  | 638.2(12)                                  | 886.4(19)                                  | 888.3   |
| 754.3(45)                                  | 749.6(45)                                  | 587.0(21)                                  | 752.6(45)                                  | 729.1   |

**Table S4.** Calculated vibrational frequencies ( $\text{cm}^{-1}$ ) and intensities (km/mol in parentheses) of the cyclic-HBC<sub>2</sub>BH isotopomers.

| H <sup>10</sup> B <sup>12</sup> C <sub>2</sub> <sup>10</sup> BH | H <sup>10</sup> B <sup>13</sup> C <sub>2</sub> <sup>10</sup> BH | D <sup>10</sup> B <sup>12</sup> C <sub>2</sub> <sup>10</sup> BD | H <sup>11</sup> B <sup>12</sup> C <sub>2</sub> <sup>11</sup> BH |         |
|-----------------------------------------------------------------|-----------------------------------------------------------------|-----------------------------------------------------------------|-----------------------------------------------------------------|---------|
| B3LYP                                                           | B3LYP                                                           | B3LYP                                                           | B3LYP                                                           | CCSD(T) |
| 2809.5(0)                                                       | 2809.4(0)                                                       | 2131.4(0)                                                       | 2793.6(0)                                                       | 2794.0  |
| 2804.8(176)                                                     | 2804.5(174)                                                     | 2133.2(237)                                                     | 2789.4(160)                                                     | 2790.1  |
| 1467.0(314)                                                     | 1439.8(303)                                                     | 1393.9(226)                                                     | 1436.9(305)                                                     | 1413.7  |
| 1269.4(0)                                                       | 1252.2(0)                                                       | 1235.8(0)                                                       | 1237.9(0)                                                       | 1210.5  |
| 1237.4(0)                                                       | 1201.7(0)                                                       | 1210.3(0)                                                       | 1223.2(0)                                                       | 1203.8  |
| 892.2(33)                                                       | 889.8(31)                                                       | 787.3(68)                                                       | 880.4(28)                                                       | 888.4   |
| 866.2(0)                                                        | 865.2(0)                                                        | 837.0(0)                                                        | 858.5(0)                                                        | 859.7   |
| 855.9(0)                                                        | 833.6(0)                                                        | 674.2(0)                                                        | 841.8(0)                                                        | 795.6   |
| 800.1(52)                                                       | 797.5(52)                                                       | 678.3(40)                                                       | 788.6(50)                                                       | 773.6   |
| 772.1(0)                                                        | 772.1(0)                                                        | 615.8(0)                                                        | 762.5(0)                                                        | 762.8   |
| 666.0(46)                                                       | 655.3(45)                                                       | 545.4(10)                                                       | 657.4(47)                                                       | 665.0   |
| 350.1(1)                                                        | 344.7(1)                                                        | 298.4(0)                                                        | 346.0(1)                                                        | 334.1   |

**Table S5.** Calculated vibrational frequencies ( $\text{cm}^{-1}$ ) and intensities ( $\text{km/mol}$  in parentheses) of the cyclic- $\text{HCB}_2\text{CH}$  isotopomers.

| $\text{H}^{12}\text{C}^{10}\text{B}_2^{12}\text{CH}$ | $\text{H}^{13}\text{C}^{10}\text{B}_2^{13}\text{CH}$ | $\text{D}^{12}\text{C}^{10}\text{B}_2^{12}\text{CD}$ | $\text{H}^{12}\text{C}^{11}\text{B}_2^{12}\text{CH}$ |         |
|------------------------------------------------------|------------------------------------------------------|------------------------------------------------------|------------------------------------------------------|---------|
| B3LYP                                                | B3LYP                                                | B3LYP                                                | B3LYP                                                | CCSD(T) |
| 3332.1(0)                                            | 3320.0(0)                                            | 2478.4(0)                                            | 3332.0(0)                                            | 3330.9  |
| 3328.6(17)                                           | 3317.3(17)                                           | 2465.4(9)                                            | 3328.5(17)                                           | 3328.9  |
| 1290.7(0)                                            | 1270.9(0)                                            | 1259.3(0)                                            | 1257.3(0)                                            | 1241.7  |
| 1230.7(0)                                            | 1209.7(0)                                            | 1198.0(0)                                            | 1204.9(0)                                            | 1182.0  |
| 1051.2(0)                                            | 1049.5(0)                                            | 992.6(0)                                             | 1020.5(0)                                            | 1012.5  |
| 923.0(0)                                             | 905.4(0)                                             | 901.8(0)                                             | 899.2(0)                                             | 900.3   |
| 908.1(23)                                            | 903.9(25)                                            | 758.3(4)                                             | 907.7(24)                                            | 889.6   |
| 786.7(0)                                             | 775.3(0)                                             | 638.5(0)                                             | 781.9(0)                                             | 760.9   |
| 721.1(33)                                            | 711.0(31)                                            | 624.1(33)                                            | 702.7(31)                                            | 700.0   |
| 593.6(0)                                             | 588.3(0)                                             | 465.4(0)                                             | 593.6(0)                                             | 560.3   |
| 536.6(88)                                            | 532.3(86)                                            | 503.2(30)                                            | 535.3(87)                                            | 517.6   |
| 487.6(0)                                             | 482.4(1)                                             | 375.8(26)                                            | 476.2(0.2)                                           | 463.2   |

**Table S6.** Calculated vibrational frequencies ( $\text{cm}^{-1}$ ) and intensities (km/mol in parentheses) of the linear HBCCBH isotopomers.

| $\text{H}^{10}\text{B}^{12}\text{C}^{12}\text{C}^{10}\text{BH}$ | $\text{H}^{10}\text{B}^{13}\text{C}^{13}\text{C}^{10}\text{BH}$ | $\text{D}^{10}\text{B}^{12}\text{C}^{12}\text{C}^{10}\text{BD}$ | $\text{H}^{11}\text{B}^{12}\text{C}^{12}\text{C}^{11}\text{BH}$ |         |
|-----------------------------------------------------------------|-----------------------------------------------------------------|-----------------------------------------------------------------|-----------------------------------------------------------------|---------|
| B3LYP                                                           | B3LYP                                                           | B3LYP                                                           | B3LYP                                                           | CCSD(T) |
| 2886.1(0)                                                       | 2885.2(0)                                                       | 2256.0(0)                                                       | 2868.7(0)                                                       | 2851.3  |
| 2884.0(37)                                                      | 2883.5(36)                                                      | 2209.4(51)                                                      | 2866.8(33)                                                      | 2849.6  |
| 2041.3(0)                                                       | 1970.4(0)                                                       | 1950.4(0)                                                       | 2034.4(0)                                                       | 2012.6  |
| 1530.1(62)                                                      | 1501.8(60)                                                      | 1443.4(43)                                                      | 1499.4(60)                                                      | 1476.9  |
| 946.4(0)                                                        | 942.1(0)                                                        | 896.3(0)                                                        | 911.1(0)                                                        | 894.0   |
| 610.4(6)                                                        | 609.4(3)                                                        | 493.9(10)                                                       | 603.5(6)                                                        | 599.2   |
| 609.7(0)                                                        | 608.5(0)                                                        | 512.1(0)                                                        | 602.8(0)                                                        | 594.9   |
| 444.9(0)                                                        | 429.8(0)                                                        | 407.3(0)                                                        | 444.4(0)                                                        | 417.6   |
| 193.8(15)                                                       | 190.5(14)                                                       | 173.1(6)                                                        | 191.0(15)                                                       | 183.6   |
